# Supplementary material for: An efficient electrochemical biosensor for the detection of heavy metal lead in food based on magnetic separation strategy and Y-DNA structure
Source: Royal Society of Chemistry journal article supplement (doi:10.1039/d2ay01747d), 2023-01-01
Supplement: d2ay01747d1.pdf [file d2ay01747d1.pdf]

**An efficient electrochemical biosensor for the detection of heavy metal lead in food based on magnetic separation strategy and Y-DNA structure**

*Zhiguang Suo<sup>a\*</sup>; Xinru Qi<sup>a</sup>; Jie Dong<sup>a</sup>; Min Wei<sup>a</sup>; Baoshan He<sup>a</sup>; Huali Jin<sup>a</sup>; Rui Guo<sup>b\*</sup>; Wenjie Ren<sup>a</sup>; Yiwei Xu<sup>a</sup>*

- a. College of Food Science and Technology, Henan Key Laboratory of Cereal and Oil Food Safety Inspection and Control, Henan University of Technology, Zhengzhou 450001, China.
- b. Henan Institute of Product Quality Supervision and Inspection, Zhengzhou 450008, China.

\*Corresponding authors. Email/Tel: [zg\\_suo@163.com](mailto:zg_suo@163.com) (Z. S.), [guoguo.106@163.com](mailto:guoguo.106@163.com) (R. G.)

Tel.: +86 371 67758022; Fax: +86 371 67758022

## Experimental Details

**Table.1** Sequences of oligonucleotides used in the experiments.

| Oligonucleotides | Sequence(5'-to-3')                  |
|------------------|-------------------------------------|
| Apt              | GGGTGGGTGGGTGGGT                    |
| cDNA             | ACCCACCCACCCGGAATATGGCGTAGGCAAT     |
| HP1              | ATTGCCTACGCCATATTCCTGCCTAACCATATCCG |
| HP2              | CGGATATGGTTAGGCAGAGGGGTGGGTGGGT     |

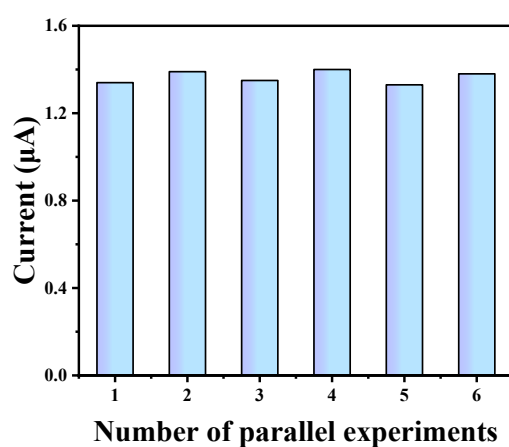

Fig.S1 Blank parallel sample test

### Pre-treatment of the gold electrode

The gold electrode was treated according to the previous study. <sup>[1]</sup> First, the gold electrode was soaked in fresh piranha solution (98% H<sub>2</sub>SO<sub>4</sub>:30% H<sub>2</sub>O<sub>2</sub> = 3:1) for 30 min and cleaned with ultrapure water. Next, the electrode was polished to a mirror shape by an electric polisher on 0.05 µm alumina powder. To remove the excess alumina powder on the electrode surface, the electrode was sonicated for 5 min by putting it into ultrapure water, anhydrous ethanol and ultrapure water, respectively. The cleaned electrode was placed into an H<sub>2</sub>SO<sub>4</sub> solution containing 0.5 M for activation. (parameter setting: scanning potential -0.3~0.5 V, scanning rate 100 mV/s, number of scanning turns 40) until a stable cyclic voltammetric curve was obtained. Finally, the activated electrode was removed, cleaned with ultrapure water and dried with dry N<sub>2</sub>.

[1] M. Wei, X. He and Y. L. Xie, *J Chin Chem Soc.*, 2020, **67**, 1247-1253.
